# Supplementary material
Source: PubMed Central journal article supplement (PMC2976339)
Supplement: supp_78_11_4895__1.pdf [file supp_78_11_4895__1.pdf]

Supplementary Table S1. Study participant details with trachoma grade and results of tests for ocular infection

| Sample ID | Ethnicity | Age (Yrs) | Gender | Clinical category | F score | P score | WHO simplified trachoma grade | Amplificor | Ct load per swab |
|-----------|-----------|-----------|--------|-------------------|---------|---------|-------------------------------|------------|------------------|
| GAR_176   | Bambara   | 3         | m      | Diseased          | 2       | 1       | TF                            | Negative   | 0                |
| GAR_175   | Bambara   | 8         | f      | Diseased          | 2       | 2       | TF                            | Negative   | 0                |
| GAR_174   | Bambara   | 8         | m      | Diseased          | 2       | 1       | TF                            | Negative   | 0                |
| GAR_173   | Bambara   | 3         | m      | Diseased          | 2       | 1       | TF                            | Negative   | 0                |
| GAR_164   | Bambara   | 6         | m      | Diseased          | 2       | 1       | TF                            | Negative   | 0                |
| GAR_155   | Bambara   | 5         | f      | Diseased          | 2       | 1       | TF                            | Negative   | 0                |
| GAR_113   | Bambara   | 5         | m      | Diseased          | 2       | 1       | TF                            | Negative   | 0                |
| GAR_112   | Bambara   | 10        | f      | Diseased          | 2       | 1       | TF                            | Negative   | 0                |
| GAR_200   | Wolof     | 3         | m      | Diseased          | 2       | 1       | TF                            | Negative   | 0                |
| GAR_198   | Wolof     | 6         | m      | Diseased          | 2       | 1       | TF                            | Negative   | 0                |
| GAR_192   | Wolof     | 13        | f      | Diseased          | 2       | 2       | TF                            | Negative   | 0                |
| GAR_189   | Wolof     | 3         | f      | Diseased          | 2       | 1       | TF                            | Negative   | 0                |
| GAR_179   | Wolof     | 4         | f      | Diseased          | 2       | 1       | TF                            | Negative   | 0                |
| GAR_147   | Wolof     | 2         | m      | Diseased          | 2       | 1       | TF                            | Negative   | 0                |
| GAR_111   | Wolof     | 8         | f      | Diseased          | 2       | 1       | TF                            | Negative   | 0                |
| GAR_137   | Wolof     | 4         | m      | Diseased          | 2       | 1       | TF                            | Positive   | 19               |
| GAR_132   | Wolof     | 9         | m      | Diseased          | 2       | 1       | TF                            | Positive   | 134              |
| GAR_130   | Wolof     | 9         | m      | Diseased          | 2       | 2       | TF                            | Positive   | 19291            |
| GAR_125   | Wolof     | 10        | m      | Diseased          | 2       | 1       | TF                            | Positive   | 17171            |
| GAR_124   | Wolof     | 10        | m      | Diseased          | 2       | 1       | TF                            | Positive   | 172              |
| GAR_123   | Wolof     | 10        | m      | Diseased          | 2       | 1       | TF                            | Positive   | 76               |
| GAR_120   | Wolof     | 5         | m      | Diseased          | 2       | 1       | TF                            | Positive   | 76               |
| GAR_108   | Wolof     | 3         | f      | Diseased          | 2       | 2       | TF                            | Positive   | 134              |
| GAR_100   | Wolof     | 9         | m      | Diseased          | 2       | 2       | TF                            | Positive   | 57               |
| GAR_169   | Bambara   | 3         | m      | Diseased          | 3       | 1       | TF                            | Negative   | 0                |
| GAR_197   | Wolof     | 1         | m      | Diseased          | 3       | 1       | TF                            | Negative   | 0                |
| GAR_148   | Wolof     | 3         | m      | Diseased          | 3       | 2       | TF                            | Negative   | 0                |
| GAR_102   | Wolof     | 0.4       | f      | Diseased          | 3       | 3       | TF/TI                         | Negative   | 0                |
| GAR_101   | Wolof     | 9         | m      | Diseased          | 3       | 1       | TF                            | Negative   | 0                |
| GAR_073   | Fula      | 2         | f      | Diseased          | 3       | 0       | TF                            | Positive   | 185270*          |
| GAR_190   | Wolof     | 4         | f      | Diseased          | 3       | 1       | TF                            | Positive   | 19*              |
| GAR_134   | Wolof     | 9         | m      | Diseased          | 3       | 2       | TF                            | Positive   | 11441            |
| GAR_133   | Wolof     | 9         | m      | Diseased          | 3       | 3       | TF/TI                         | Positive   | 1184             |
| GAR_128   | Wolof     | 10        | m      | Diseased          | 3       | 2       | TF                            | Positive   | 745              |
| GAR_119   | Wolof     | 9         | m      | Diseased          | 3       | 2       | TF                            | Positive   | 115              |
| GAR_118   | Wolof     | 7         | m      | Diseased          | 3       | 3       | TF/TI                         | Positive   | 4489*            |
| GAR_117   | Wolof     | 7         | m      | Diseased          | 3       | 2       | TF                            | Positive   | 1471             |
| GAR_106   | Wolof     | 7         | m      | Diseased          | 3       | 3       | TF/TI                         | Positive   | 6819             |
| GAR_104   | Wolof     | 12        | f      | Diseased          | 3       | 2       | TF                            | Positive   | 458*             |
| GAR_103   | Wolof     | 8         | m      | Diseased          | 3       | 2       | TF                            | Positive   | 1337             |
| GAR_221   | Bambara   | 4         | m      | Normal            | 0       | 1       | --                            | Negative   | 0                |
| GAR_220   | Bambara   | 4         | m      | Normal            | 0       | 0       | --                            | Negative   | 0                |
| GAR_219   | Bambara   | 1         | m      | Normal            | 0       | 0       | --                            | Negative   | 0                |
| GAR_217   | Bambara   | 8         | f      | Normal            | 0       | 1       | --                            | Negative   | 0                |
| GAR_216   | Bambara   | 10        | f      | Normal            | 0       | 1       | --                            | Negative   | 0                |
| GAR_213   | Bambara   | 2         | m      | Normal            | 0       | 0       | --                            | Negative   | 0                |
| GAR_212   | Bambara   | 2         | m      | Normal            | 0       | 1       | --                            | Negative   | 0                |
| GAR_211   | Bambara   | 5         | m      | Normal            | 0       | 0       | --                            | Negative   | 0                |
| GAR_210   | Bambara   | 7         | f      | Normal            | 0       | 0       | --                            | Negative   | 0                |
| GAR_209   | Bambara   | 5         | m      | Normal            | 0       | 0       | --                            | Negative   | 0                |
| GAR_208   | Bambara   | 4         | f      | Normal            | 0       | 1       | --                            | Negative   | 0                |
| GAR_207   | Bambara   | 2         | m      | Normal            | 0       | 0       | --                            | Negative   | 0                |
| GAR_206   | Bambara   | 6         | f      | Normal            | 0       | 0       | --                            | Negative   | 0                |
| GAR_218   | Wolof     | 1         | m      | Normal            | 0       | 1       | --                            | Negative   | 0                |
| GAR_215   | Wolof     | 8         | m      | Normal            | 0       | 1       | --                            | Negative   | 0                |
| GAR_214   | Wolof     | 7         | f      | Normal            | 0       | 1       | --                            | Negative   | 0                |
| GAR_205   | Wolof     | 4         | f      | Normal            | 0       | 0       | --                            | Negative   | 0                |
| GAR_204   | Wolof     | 7         | f      | Normal            | 0       | 0       | --                            | Negative   | 0                |
| GAR_203   | Wolof     | 4         | m      | Normal            | 0       | 1       | --                            | Negative   | 0                |
| GAR_202   | Wolof     | 6         | f      | Normal            | 0       | 1       | --                            | Negative   | 0                |

| Supplementary Table S2. Clinical severity and association with ompA load and the proportion of Amplicor positive individuals |    |                          |                              |                 |    |                          |                              |
|------------------------------------------------------------------------------------------------------------------------------|----|--------------------------|------------------------------|-----------------|----|--------------------------|------------------------------|
| Follicular score                                                                                                             | n  | No. of Amplicor positive | ompA load (mean copies/swab) | Papillary score | n  | No. of Amplicor positive | ompA load (mean copies/swab) |
| F0                                                                                                                           | 20 | 0                        | 0                            | P0              | 11 | 1                        | 18527*                       |
| F1                                                                                                                           | 0  | -                        | -                            | P1              | 35 | 7                        | 535                          |
| F2                                                                                                                           | 24 | 9                        | 1,485                        | P2              | 12 | 9                        | 2,921                        |
| F3                                                                                                                           | 16 | 11                       | 14,223                       | P3              | 4  | 3                        | 3,123                        |

\* a single participant without any signs of papillary hypertrophy was Amplicor positive with a high ompA load. This participant had a follicular score of F3

Supplementary Table S5a

|                                                             | N v DI                                      | N v D                                      | D v DI                                      |
|-------------------------------------------------------------|---------------------------------------------|--------------------------------------------|---------------------------------------------|
| HG v U133 plus 2.0                                          | $r^2 = 0.6048$ , $p > 0.0001$<br>(n = 8793) | $r^2 = 0.41$ , $p > 0.0001$<br>(n = 8793)  | $r^2 = 0.1523$ , $p > 0.0001$<br>(n = 8793) |
| Differentially regulated probe-sets (FC > 1.625 or < 0.615) |                                             |                                            |                                             |
| HG v U133 plus 2.0                                          | $r^2 = 0.8446$ , $p > 0.0001$<br>(n = 1184) | $r^2 = 0.8189$ , $p > 0.0001$<br>(n = 357) | $r^2 = 0.4272$ , $p > 0.0001$<br>(n = 285)  |

Supplementary Table S5b

| Key genes which are differentially up-regulated (fold change of top 3 genes from the U133 plus 2.0 array matched with HG-focused target arrays) |        |       |       |       |       |         |        |       |
|-------------------------------------------------------------------------------------------------------------------------------------------------|--------|-------|-------|-------|-------|---------|--------|-------|
|                                                                                                                                                 | N v DI |       |       | N v D |       |         | D v DI |       |
| Gene                                                                                                                                            | U133   | HG    | Gene  | U133  | HG    | Gene    | U133   | HG    |
| CXCL13                                                                                                                                          | 21.958 | 1.808 | MS4A1 | 4.943 | 2.806 | SPARCL1 | 4.249  | 1.243 |
| S100A7                                                                                                                                          | 20.559 | 1.972 | NOX1  | 4.902 | 2.128 | ADH1C   | 4.091  | 2.906 |
| CXCL11                                                                                                                                          | 15.741 | 5.407 | CD19  | 3.833 | 3.115 | NDST4   | 3.304  | 3.767 |

Supplementary Table S5c

| Cluster number | Example genes that are differentially regulated (fold change of top genes from U133 plus 2.0 matched with HG-focused target arrays) for each cluster. Values are fold changes of group N v DI. |        |       |
|----------------|------------------------------------------------------------------------------------------------------------------------------------------------------------------------------------------------|--------|-------|
|                | Gene                                                                                                                                                                                           | U133   | HG    |
| MCL1           | BBOX1                                                                                                                                                                                          | 0.115  | 0.345 |
| MCL2           | MMP12                                                                                                                                                                                          | 7.725  | 4.077 |
| MCL3           | IL1B                                                                                                                                                                                           | 6.740  | 3.249 |
| MCL4           | RRM2                                                                                                                                                                                           | 3.366  | 4.104 |
| MCL5           | TRA2A                                                                                                                                                                                          | 1.406  | 1.234 |
| MCL6           | SERPINB7                                                                                                                                                                                       | 6.125  | 1.334 |
| MCL7           | TNFRSF17                                                                                                                                                                                       | 4.896  | 1.688 |
| MCL8           | CXCL11                                                                                                                                                                                         | 15.741 | 5.407 |
| MCL9           | MS4A1                                                                                                                                                                                          | 8.126  | 3.801 |
| MCL10          | ISG15                                                                                                                                                                                          | 2.295  | 1.934 |
| MCL11-259      | IL19                                                                                                                                                                                           | 8.628  | 2.048 |
| MCL260-577     | MMP9                                                                                                                                                                                           | 9.165  | 2.466 |

Supplementary Table S5d

| Gene  | RTPCR        | U133         | HG           | RTPCR               | U133                | HG                  |
|-------|--------------|--------------|--------------|---------------------|---------------------|---------------------|
|       | Disease only | Disease only | Disease only | Disease & Infection | Disease & Infection | Disease & Infection |
| IDO   | 1.08         | 2.726        | 1.889        | 7.93                | 4.099               | 2.469               |
| IFNG  | 0.62         | 1.224        | 1.248        | 6.73                | 4.829               | 2.051               |
| FOXP3 | 1.37         | 1.038        | -            | 1.37                | 0.939               | -                   |
| IL10  | 1.10         | 1.399        | 1.101        | 2.20                | 2.567               | 1.165               |
| HPRT1 | -            | 1.005        | 0.813        | -                   | 0.942               | 0.734               |

Data from previous qRTPCR studies in which children (n = 346) between the ages of 4-15 years were studied. Data are adapted from Faal et al (39) with the addition of infection diagnosis by Amplicor PCR rather than the expression of CT 16SrRNA. The series of HG-focused target arrays (GSE20430) consisted of 29 arrays in total. Twenty-five of these were from equivalent clinical and infection categories as those described for the U133 plus 2.0 arrays. These were Groups N (n = 8); Group D (n = 10) and Group DI (n = 7). The remaining 4 arrays in this series were from participants without the clinical signs of active trachoma but were positive by Amplicor PCR.
